# Supplementary material for: Absolute Quantification of Isoflavones in the Flowers of Pueraria lobata by qHNMR
Source: MDPI journal article supplement (doi:10.3390/plants11040548), 2022-02-18

## Supporting Information

# Absolute Quantification of Isoflavones in the Flowers of *Pueraria lobata* by qHNMR

Punam Thapa <sup>1</sup>, Hye Mi Kim <sup>2</sup>, Joon-Pyo Hong <sup>3</sup>, Ranhee Kim <sup>3</sup>, Sunil Babu Paudel <sup>1</sup>, Hyukjae Choi <sup>1,4</sup>, Dae Sik Jang <sup>2,3,\*</sup> and Joo-Won Nam <sup>1,\*</sup>

<sup>1</sup> College of Pharmacy, Yeungnam University, Gyeongsan-si, Gyeongsangbukdo 38541, Republic of Korea; pansup35@gmail.com (P.T); phrsunil@gmail.com (S.B.P); h5choi@yu.ac.kr (H.C.); jwnam@yu.ac.kr (J.-W.N.)

<sup>2</sup> College of Pharmacy, Kyung Hee University, Seoul 02447, Republic of Korea; hyemi586@gmail.com (H.M.K); dsjang@khu.ac.kr (D.S.J.)

<sup>3</sup> Department of Life and Nanopharmaceutical Sciences, Graduate School, Kyung Hee University, Seoul 02447, Republic of Korea; ongjoon@naver.com (J.-P.H.); rhee0423@khu.ac.kr (R.K.); dsjang@khu.ac.kr (D.S.J.)

<sup>4</sup> Research Institute of Cell Culture, Yeungnam University, Gyeongsan, Gyeongbuk 38541, Republic of Korea; h5choi@yu.ac.kr (H.C.)

|        |      |                                                                                                                                                                                                  |    |
|--------|------|--------------------------------------------------------------------------------------------------------------------------------------------------------------------------------------------------|----|
| Figure | S1.  | <sup>1</sup> H NMR (600 MHz, DMSO- <i>d</i> <sub>6</sub> ) of 5-methoxydaidzein ( <b>1</b> ).....                                                                                                | 3  |
| Figure | S2.  | <sup>1</sup> H NMR (600 MHz, DMSO- <i>d</i> <sub>6</sub> ) of tectorigenin ( <b>2</b> ).....                                                                                                     | 4  |
| Figure | S3.  | <sup>1</sup> H NMR (600 MHz, DMSO- <i>d</i> <sub>6</sub> ) of genistin ( <b>3</b> ).....                                                                                                         | 5  |
| Figure | S4.  | <sup>1</sup> H NMR (600 MHz, DMSO- <i>d</i> <sub>6</sub> ) of glycitin ( <b>4</b> ).....                                                                                                         | 6  |
| Figure | S5.  | <sup>1</sup> H NMR (600 MHz, DMSO- <i>d</i> <sub>6</sub> ) of tectoridin ( <b>5</b> ).....                                                                                                       | 7  |
| Figure | S6.  | <sup>1</sup> H NMR (600 MHz, DMSO- <i>d</i> <sub>6</sub> ) of 7- <i>O</i> -β-D-xylopyranosyl-(1-6)- <i>O</i> -β-D-glucopyranoside ( <b>6</b> ).....                                              | 8  |
| Figure | S7.  | <sup>1</sup> H NMR (600 MHz, DMSO- <i>d</i> <sub>6</sub> ) of tectorigenin-7- <i>O</i> -β-D-xylosylglucoside ( <b>7</b> ).....                                                                   | 9  |
| Figure | S8.  | LR-ESI-MS of 5-methoxydaidzein ( <b>1</b> ).....                                                                                                                                                 | 10 |
| Figure | S9.  | LR-ESI-MS of tectorigenin ( <b>2</b> ).....                                                                                                                                                      | 10 |
| Figure | S10. | LR-ESI-MS of genistin ( <b>3</b> ).....                                                                                                                                                          | 11 |
| Figure | S11. | LR-ESI-MS of glycitin ( <b>4</b> ).....                                                                                                                                                          | 11 |
| Figure | S12. | LR-ESI-MS of tectoridin ( <b>5</b> ).....                                                                                                                                                        | 12 |
| Figure | S13. | LR-ESI-MS of 7- <i>O</i> -β-D-xylopyranosyl-(1-6)- <i>O</i> -β-D-glucopyranoside ( <b>6</b> ).....                                                                                               | 12 |
| Figure | S14. | LR-ESI-MS of tectorigenin-7- <i>O</i> -β-D-xylosylglucoside ( <b>7</b> ).....                                                                                                                    | 13 |
| Figure | S15. | Resonance at δ <sub>H</sub> 8.45 ppm of tectoridin to determine LOD and LOQ using S/N ratio.....                                                                                                 | 14 |
| Figure | S16. | The stacked <sup>1</sup> H NMR spectra of the crude extract with IC before and after spiking of tectoridin (Internal calibrant: methyl 3,5-dinitrobenzoate).....                                 | 15 |
| Figure | S17. | Accuracy determination using the recovery method.....                                                                                                                                            | 16 |
| Figure | S18. | HPLC-UV profiles of the extracts (PLr and PLs) and calibration curves of tectorigenin ( <b>2</b> ), tectoridin ( <b>5</b> ) and tectorigenin-7- <i>O</i> -β-D-xylosylglucoside ( <b>7</b> )..... | 17 |

Figure S1.  $^1\text{H}$  NMR (600 MHz,  $\text{DMSO}-d_6$ ) of 5-methoxydaidzein (**1**)

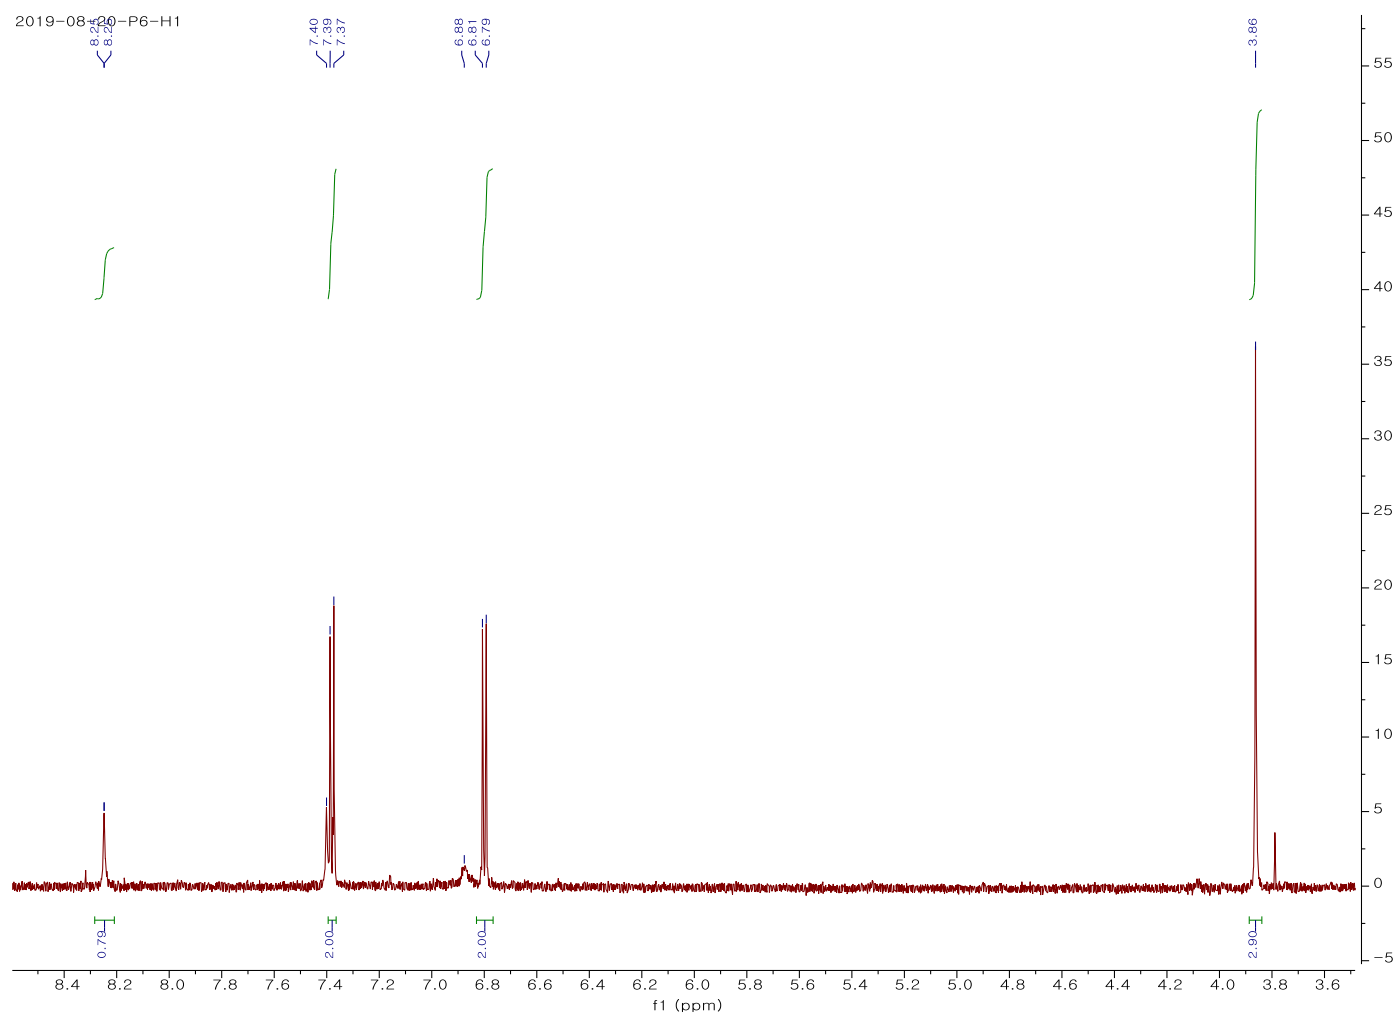

Figure S2.  $^1\text{H}$  NMR (600 MHz,  $\text{DMSO}-d_6$ ) of tectorigenin (**2**)

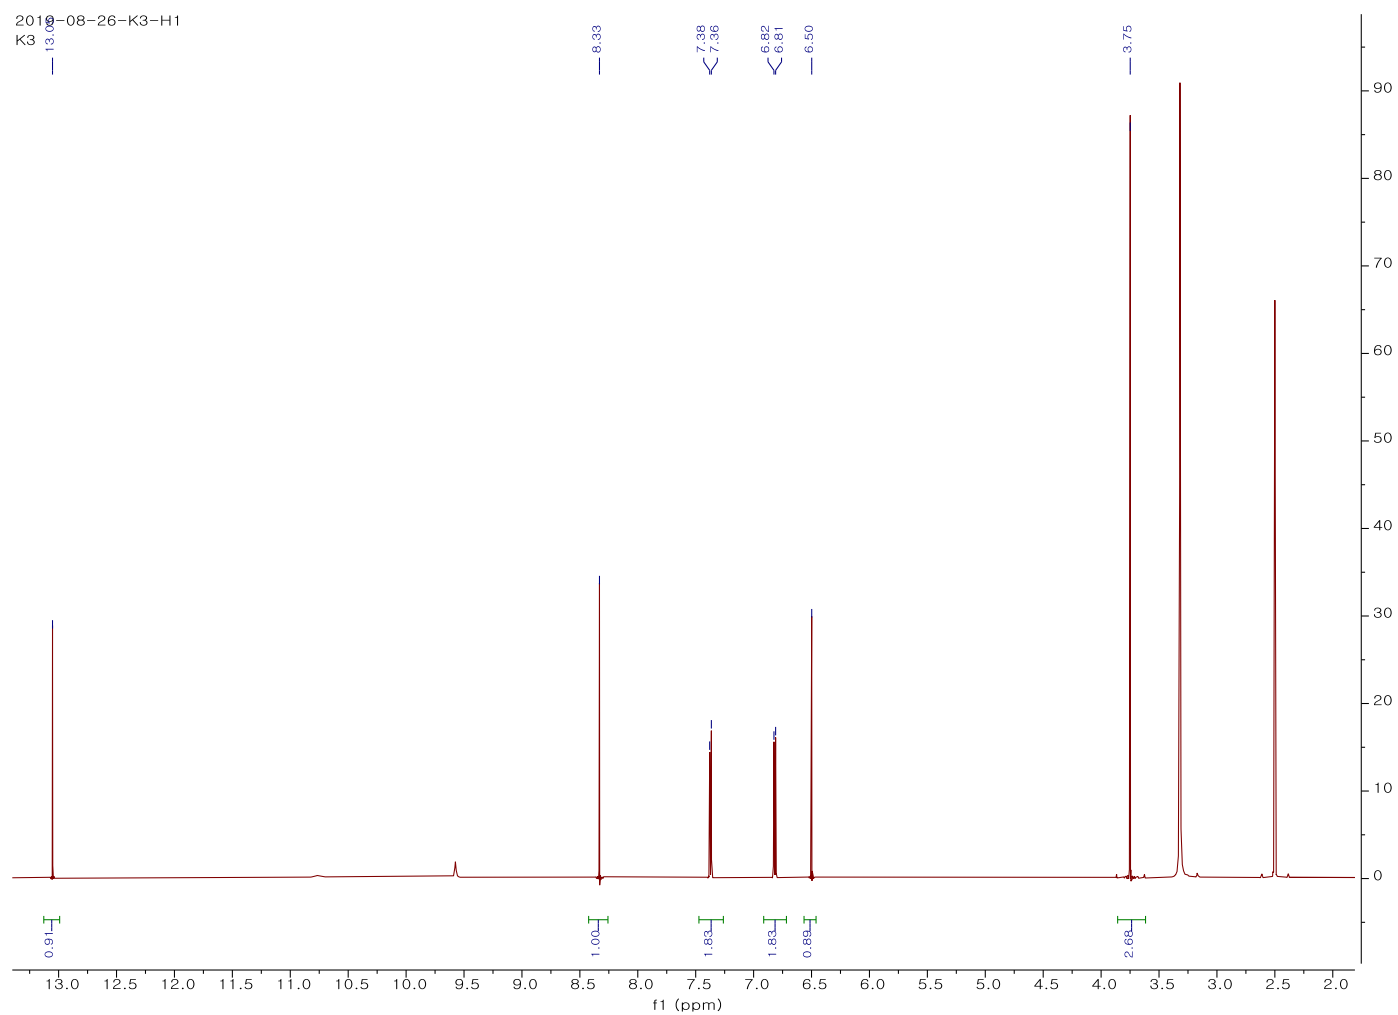

Figure S3.  $^1\text{H}$  NMR (600 MHz,  $\text{DMSO}-d_6$ ) of genistin (**3**)

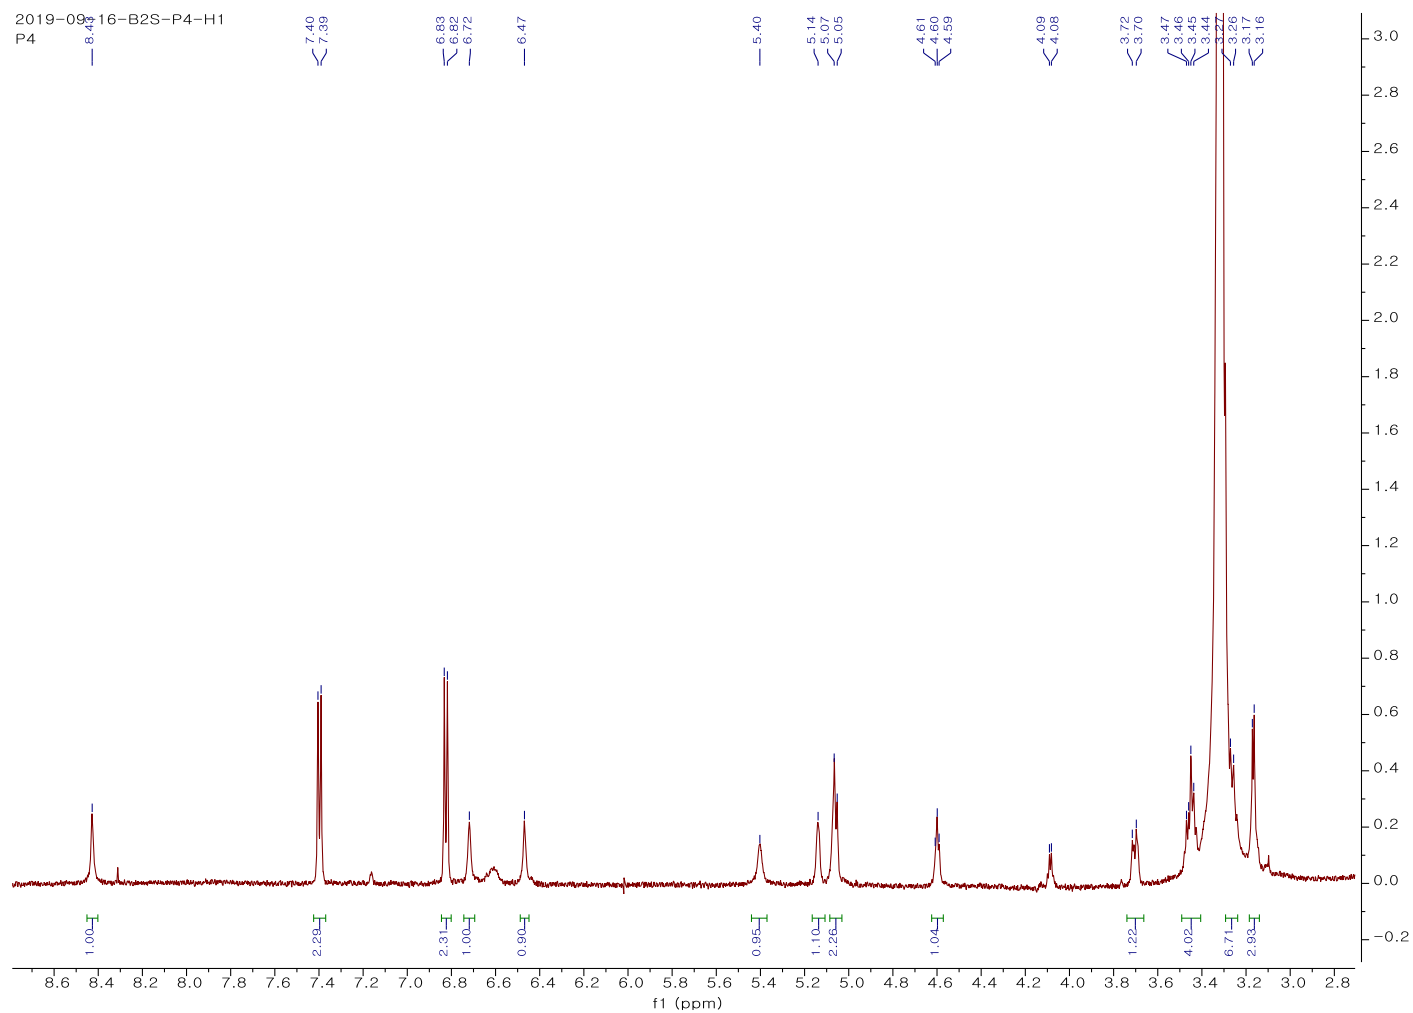

Figure S4.  $^1\text{H}$  NMR (600 MHz,  $\text{DMSO-}d_6$ ) of glycitin (**4**)

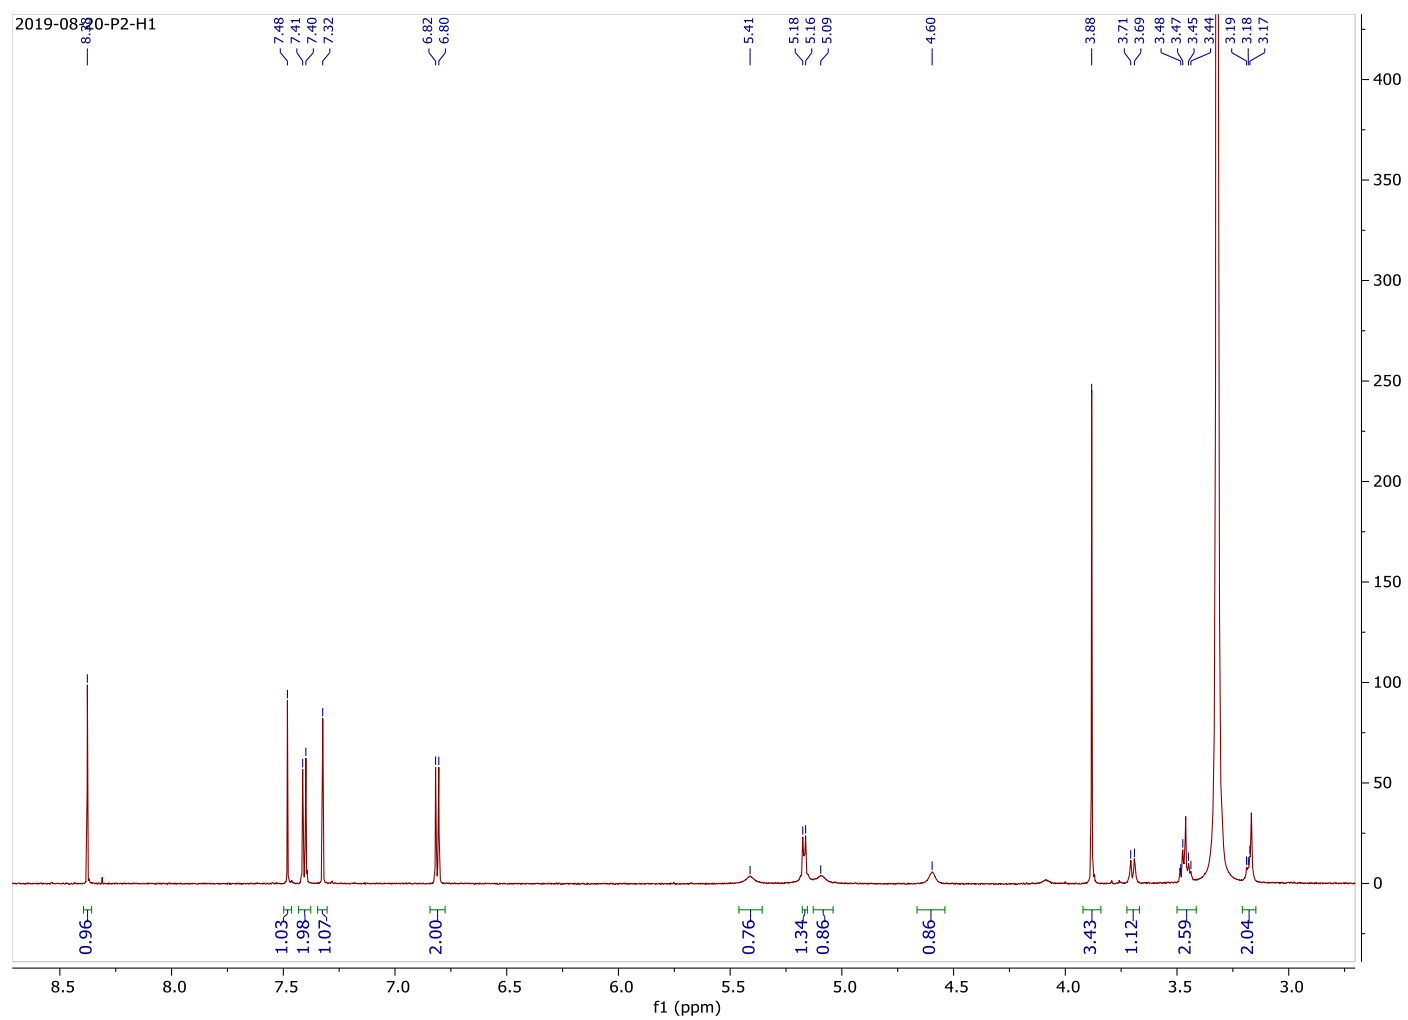

Figure S5.  $^1\text{H}$  NMR (600 MHz,  $\text{DMSO}-d_6$ ) of tectoridin (**5**)

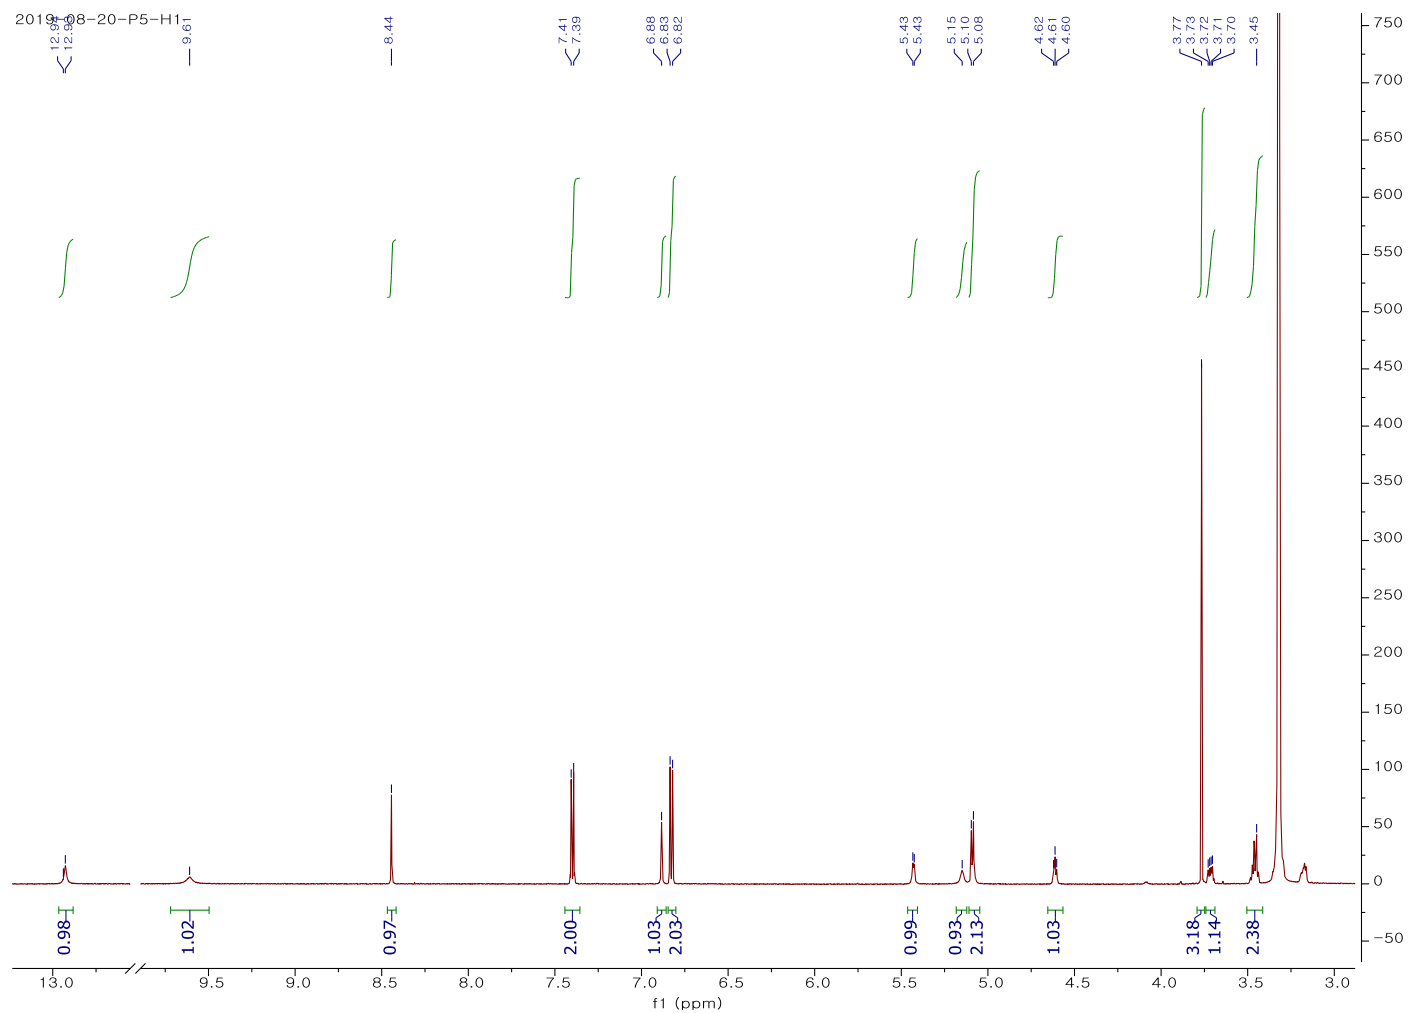

Figure S6.  $^1\text{H}$  NMR (600 MHz,  $\text{DMSO-}d_6$ ) of 7- $O$ - $\beta$ -D-xylopyranosyl-(1-6)- $O$ - $\beta$ -D-glucopyranoside (**6**)

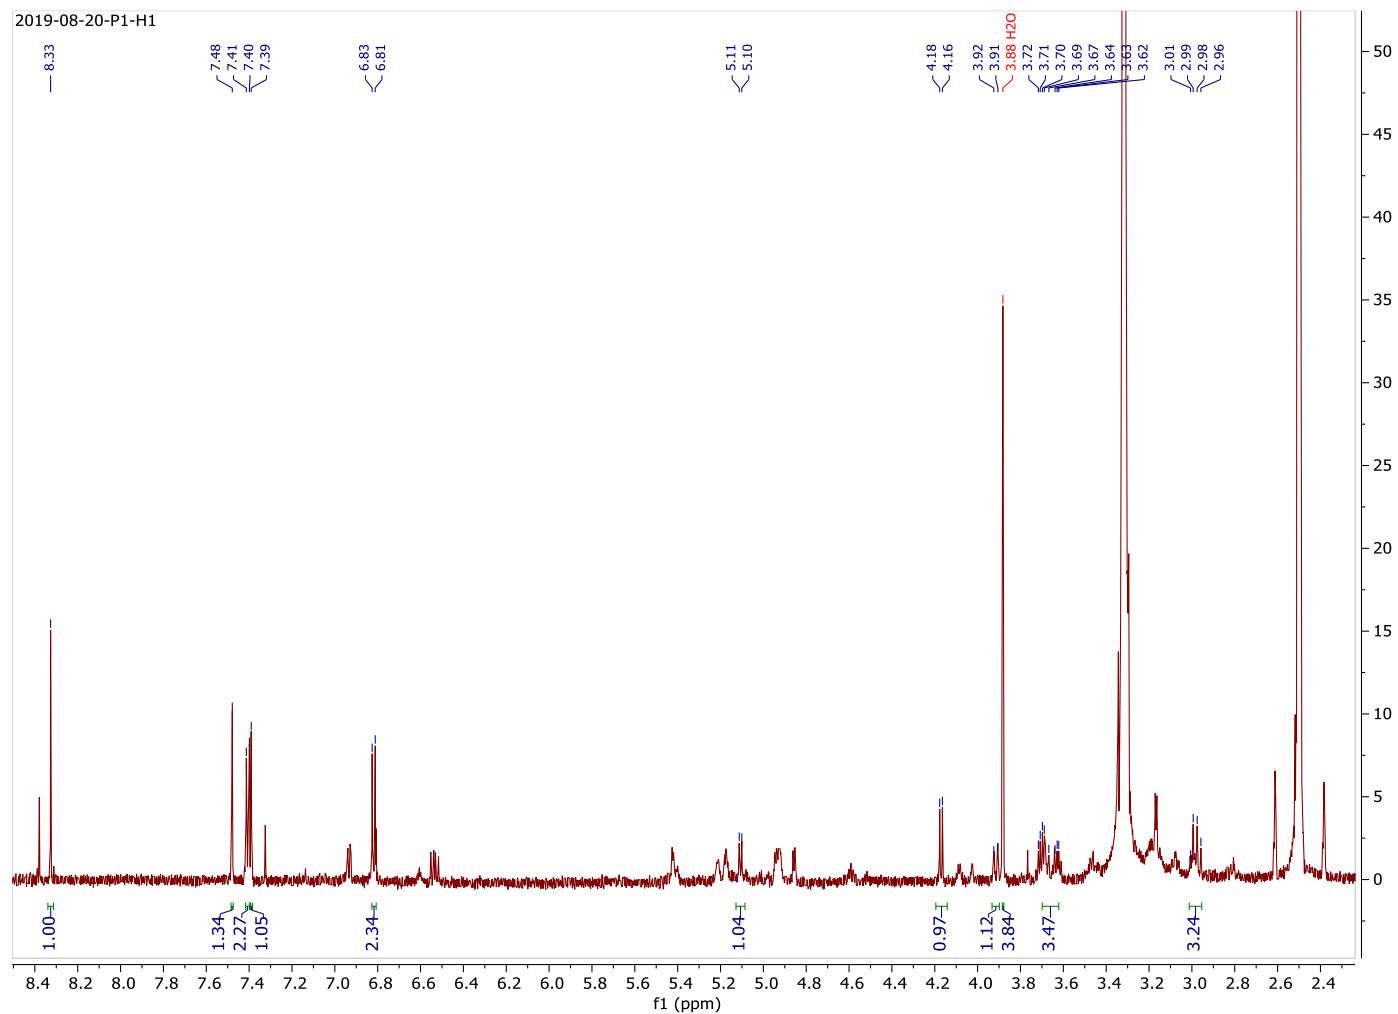



Figure S7.  $^1\text{H}$  NMR (600 MHz,  $\text{DMSO}-d_6$ ) of tectorgenin-7- $O$ - $\beta$ -D-xylosylglucoside (**7**)

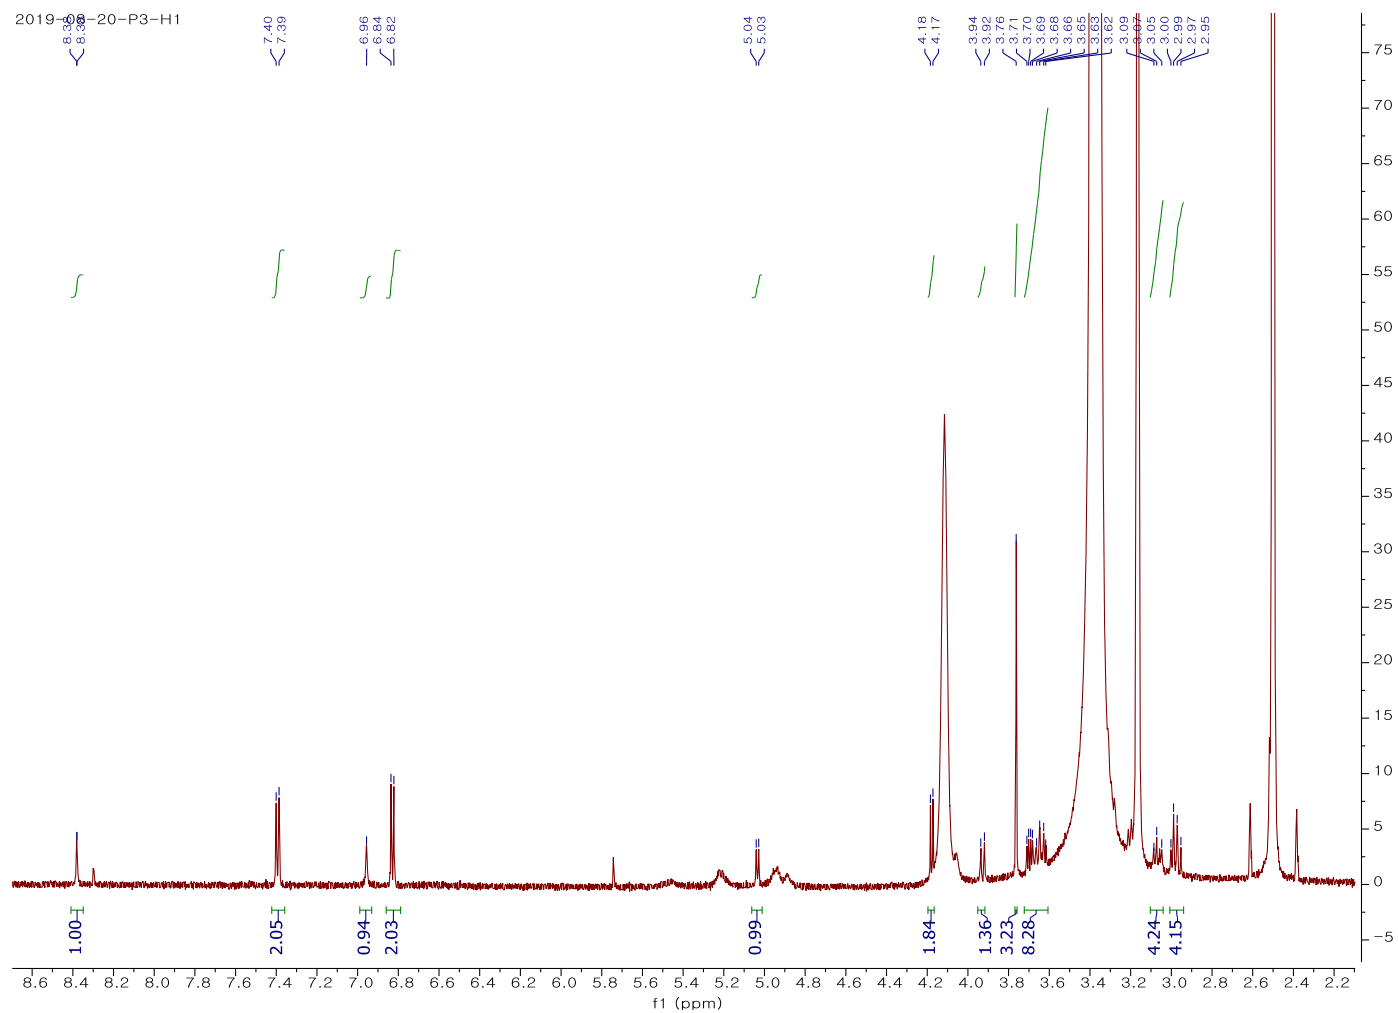

Figure S8. LR-ESI-MS of 5-methoxydaidzein (**1**)

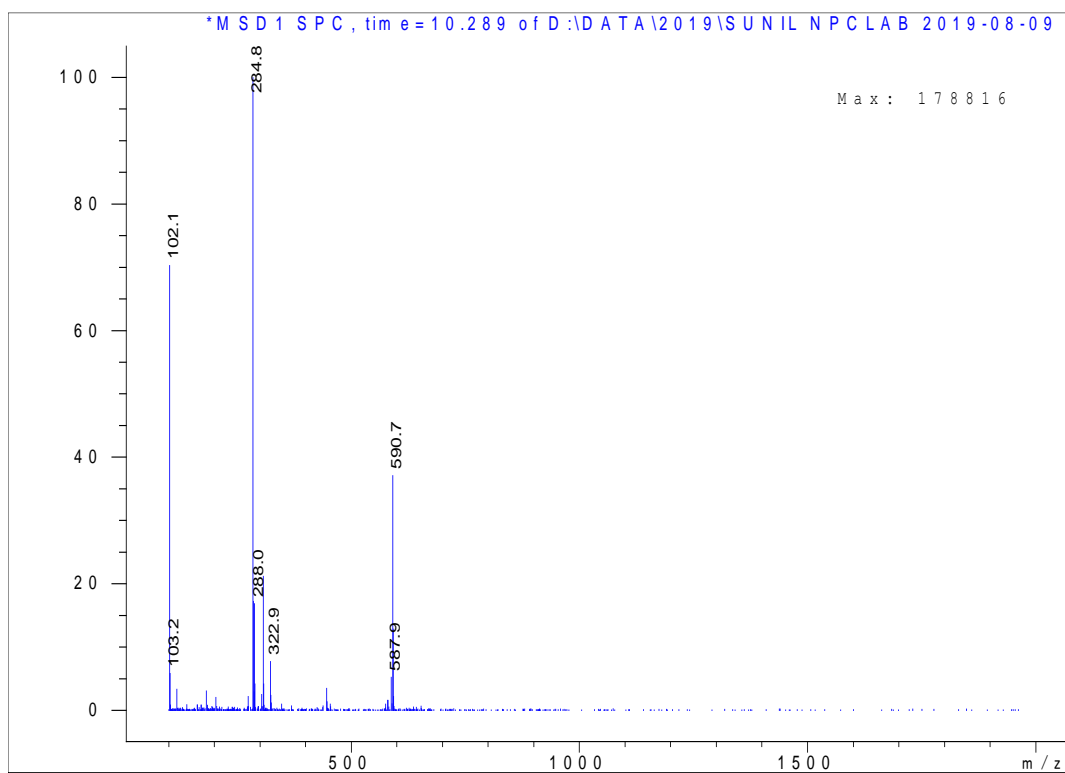

Figure S9. LR-ESI-MS of tectorigenin (**2**)

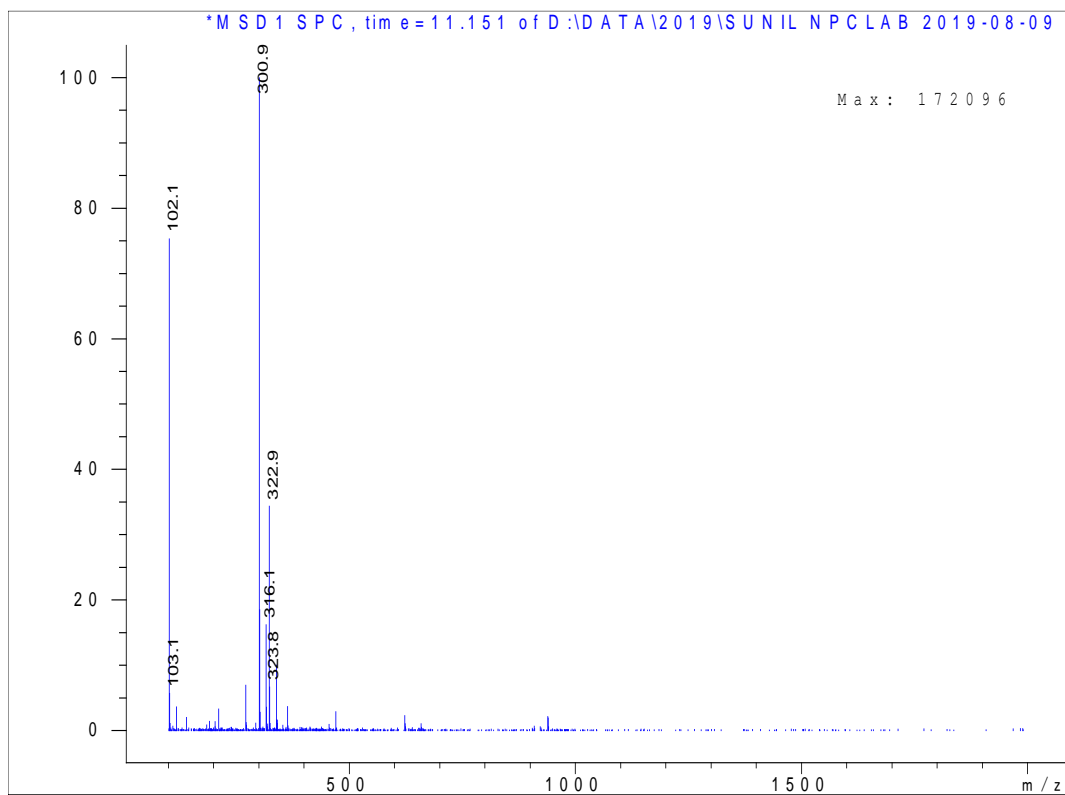

Figure S10. LR-ESI-MS of genistin (**3**)

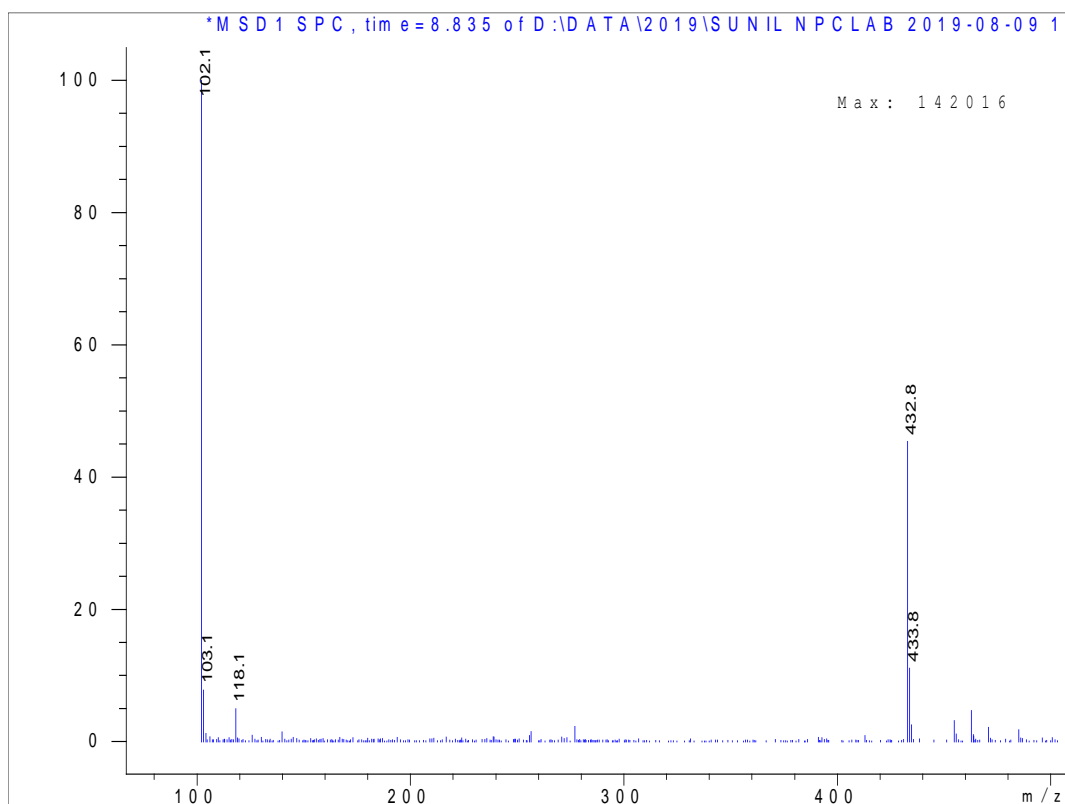

Figure S11. LR-ESI-MS of glycitin (**4**)

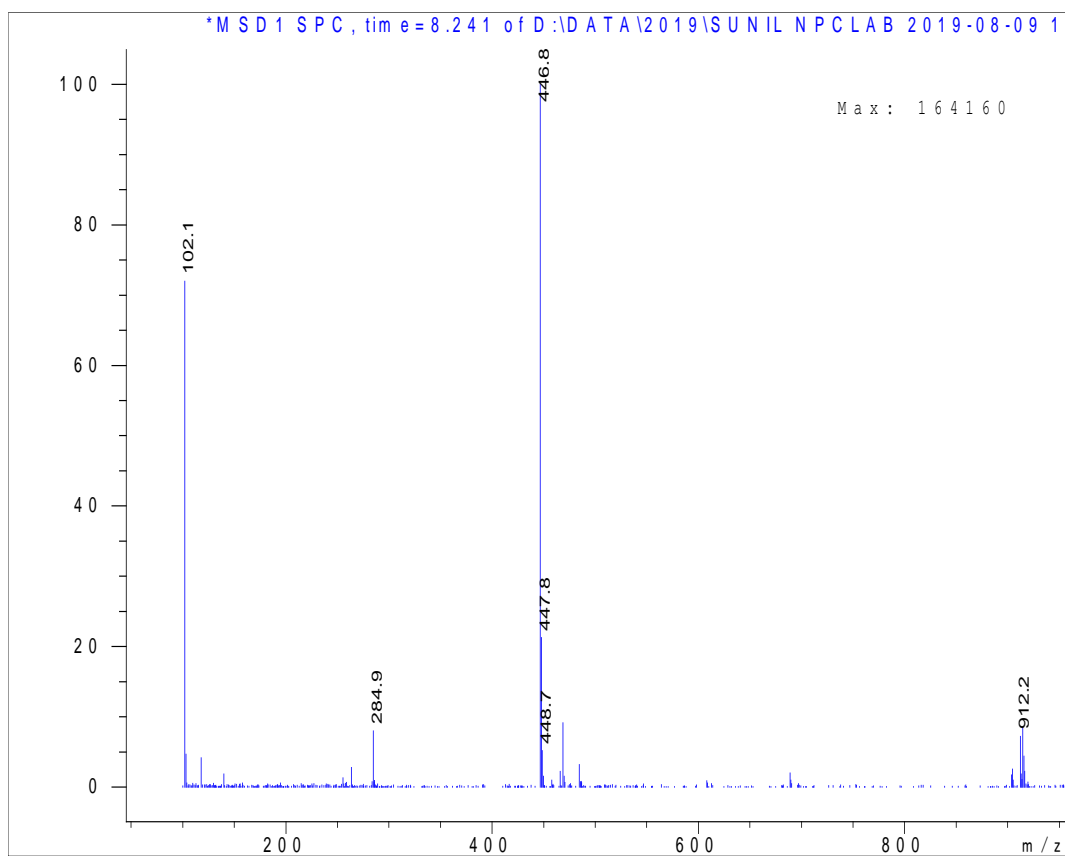

Figure S12. LR-ESI-MS of tectoridin (**5**)

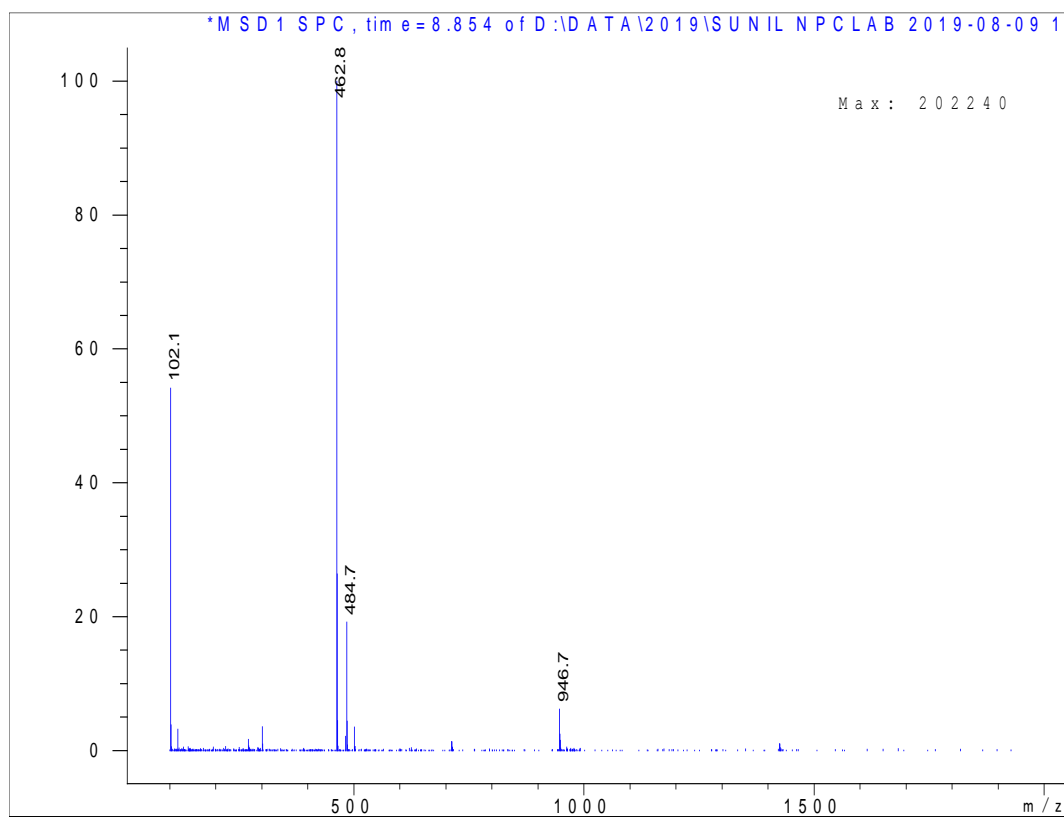

Figure S13. LR-ESI-MS of 7-O- $\beta$ -D-xylopyranosyl-(1-6)-O- $\beta$ -D-glucopyranoside (**6**)

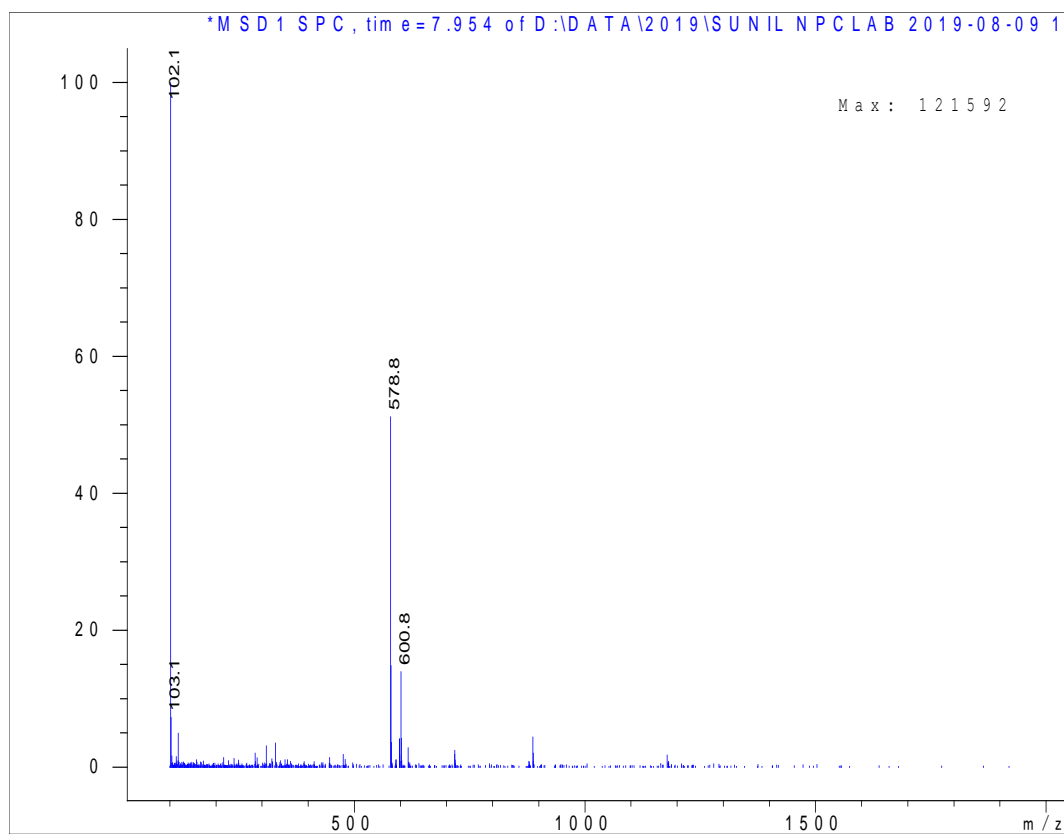

Figure S14. LR-ESI-MS of tectorgenin-7-O- $\beta$ -D-xylosylglucoside (7)

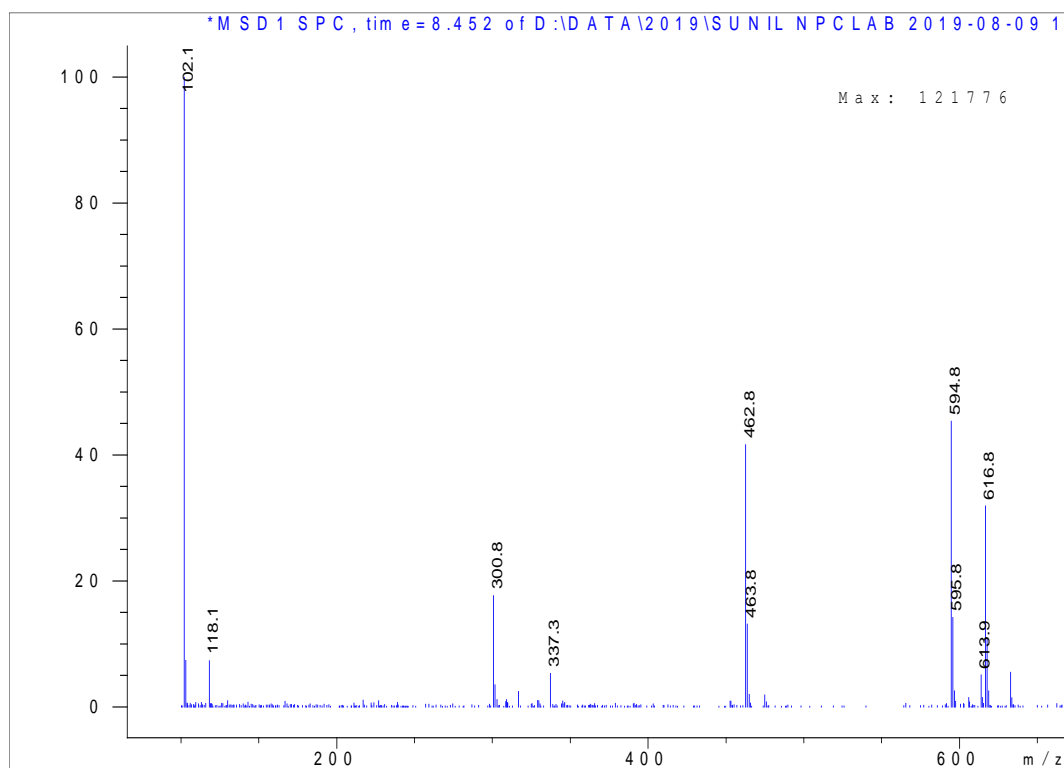

Figure S15. Resonance at  $\delta_H$  8.45 ppm of tectoridin to determine LOD and LOQ using S/N ratio.

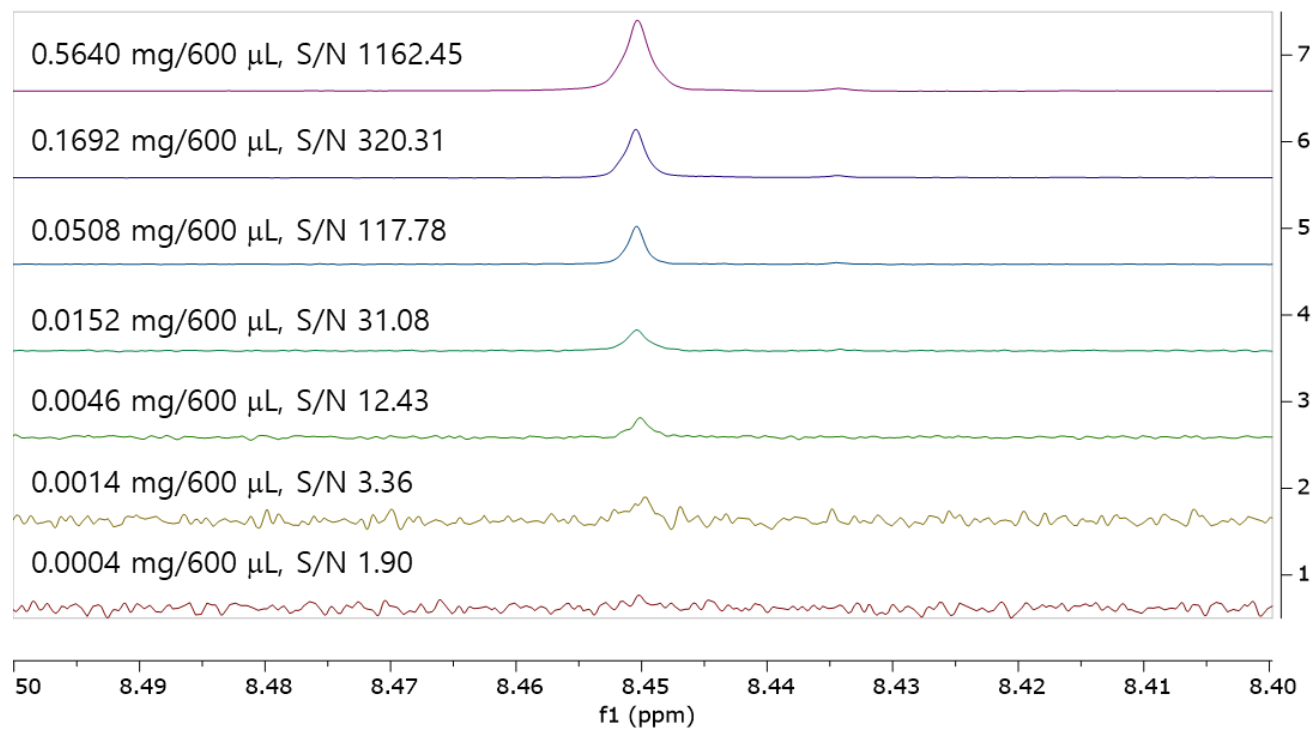

Figure S16. The stacked  $^1\text{H}$  NMR spectra of the crude extract with IC before and after spiking of tectoridin (Internal calibrant: methyl 3,5-dinitrobenzoate).

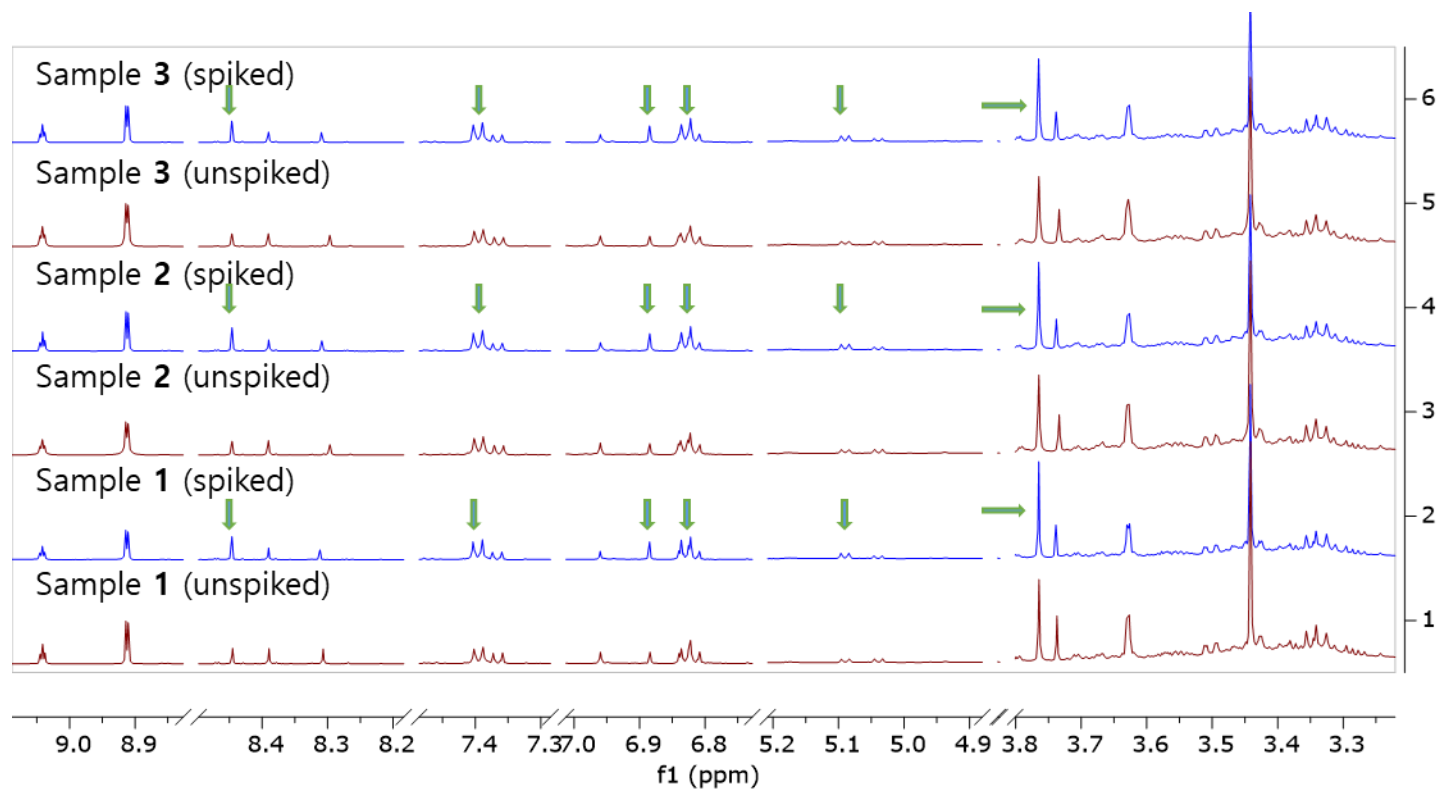

Figure S17. Accuracy determination using the recovery method

|                               | Qty of tectoridin (mg) | % tectoridin after spiking | Qty of extract (mg) | Qty of tectoridin before spiking (mg) |
|-------------------------------|------------------------|----------------------------|---------------------|---------------------------------------|
| Sample 1                      | 1.2933                 | 12.4000                    | 10.43               | 0.6800                                |
| Sample 2                      | 1.2976                 | 12.9500                    | 10.02               | 0.6753                                |
| Sample 3                      | 1.2392                 | 12.3800                    | 10.01               | 0.6296                                |
| Qty of tectoridin spiked (mg) |                        | 0.6250                     |                     |                                       |
| <b>Accuracy</b>               |                        |                            |                     |                                       |
|                               | true value (mg)        | observed value (mg)        | relative error (%)  | recovery (%)                          |
| Sample 1                      | 1.3050                 | 1.2933                     | 0.9059              | 98.1254                               |
| Sample 2                      | 1.3003                 | 1.2976                     | 0.2125              | 99.5587                               |
| Sample 3                      | 1.2546                 | 1.2392                     | 1.2420              | 97.5374                               |
| <b>Average</b>                |                        |                            | 0.7868              | 98.4072                               |



Figure S18. HPLC-UV profiles of the extracts (PLr and PLs) and calibration curves of tectorigenin (**2**), tectoridin (**5**) and tectorigenin-7-*O*- $\beta$ -D-xylosylglucoside (**7**).

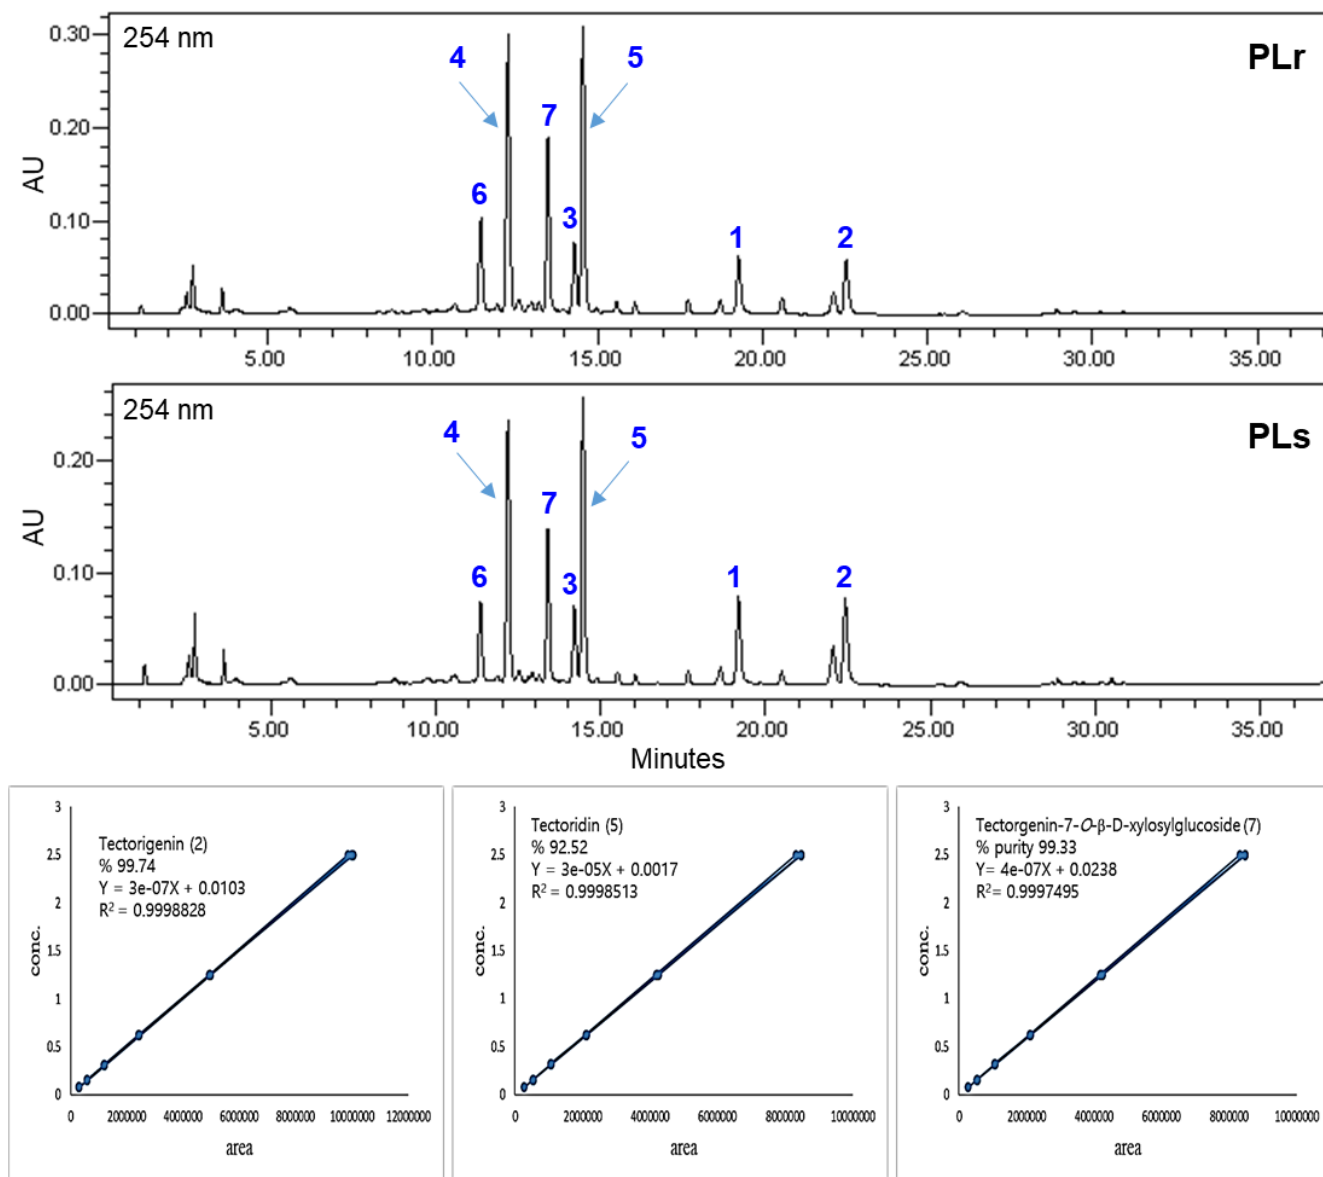

Supplement: s1 [file s1]
